# Supplementary material for: Synthetic nanobody–SARS-CoV-2 receptor-binding domain structures identify distinct epitopes
Source: PubMed Central journal article supplement (PMC7852268; doi:10.1101/2021.01.27.428466), 2021-01-27
Supplement: NIHPP2021.01.27.428466-supplement-1.pdf [file NIHPP2021.01.27.428466-supplement-1.pdf]

1  
2  
3  
4  
5  
6  
7  
8  
9  
10  
11  
12  
13  
14  
15  
16  
17  
18  
19  
20  
21

## Supplementary Materials for

Synthetic nanobody–SARS-CoV-2 receptor-binding domain structures identify distinct epitopes

Javeed Ahmad<sup>1†</sup>, Jiansheng Jiang<sup>1†</sup>, Lisa F. Boyd<sup>1</sup>, Kannan Natarajan<sup>1</sup>,  
David H. Margulies<sup>1\*</sup>

Correspondence to: [dmargulies@niaid.nih.gov](mailto:dmargulies@niaid.nih.gov) (D.H.M)

### **This PDF file includes:**

- Materials and Methods
- Supplementary Text
- Figs. S1 to S8
- Tables S1 to S3

## 22 **Materials and Methods**

### 23 *Subcloning, expression and purification of RBD, spike, and sybody proteins*

24 The sequences encoding the RBD of the SARS-CoV-2 spike protein (amino acids 333 to  
25 529) were subcloned into pET21b(+), (Novagen) via *Nde*I and *Eco*RI restriction sites, using  
26 pcDNA3-SARS-CoV-2-RBD-8his (Addgene #145145, (33)) as template. The primers used were  
27 forward primer, 5'-TGCAGTCATATGAATCTTTGTCCGTTCCGGTGAG and reverse primer,  
28 5'-TGCAGTGAATTCTCACCCCTTTTTGGGCCCAAACT. The RBD was expressed as  
29 inclusion bodies in *E. coli* strain BL21(DE3) (Novagen). Expression, isolation of inclusion  
30 bodies, denaturation and reduction was done in 6 M guanidine hydrochloride and 0.1 mM DTT  
31 as described elsewhere (34). Briefly, refolding was carried out in a refolding buffer  
32 supplemented with oxidized and reduced glutathione and arginine for 3 days at 4 °C followed by  
33 dialysis against HEPES buffer (25 mM HEPES, pH 7.3, 150 mM NaCl). Concentrated and  
34 filtered protein was analyzed by size-exclusion chromatography on a Superdex 200 10/300 GL  
35 column (GE Healthcare) equilibrated with HEPES buffer. The peak corresponding to 24 kDa  
36 (monomeric) protein was collected, concentrated and further purified by ion-exchange  
37 chromatography on Mono-Q® (Cytiva).

38 Plasmids pSb-init encoding sybodies Sb16, Sb45. and Sb68 (Addgene #153524,  
39 #153526, and #153527, respectively) were originally reported by Walter et al (35) and  
40 generously made available. All plasmids were verified by DNA sequencing. Purification of the  
41 recombinant proteins from the periplasm of *E. coli* MC1061 was based on a protocol described  
42 elsewhere (36). Briefly, *E. coli* MC1061, transformed with a sybody-encoding plasmid, was  
43 grown in Terrific Broth (TB) medium (Gibco) supplemented with 25 µg/ml chloramphenicol, at  
44 37 °C with shaking at 160 rpm for 2 hrs. The temperature was then decreased to 22 °C until  $A_{600}$

45 reached 0.5. Protein expression was induced by addition of L-(+)-arabinose (Sigma) to a final  
46 concentration of 0.02% (w/v) and expression continued overnight at 22 °C and 160 rpm. The  
47 next day cells were collected by centrifugation at 2000 x g for 15 minutes. The cell pellet was  
48 then washed twice in PBS and resuspended in periplasmic extraction buffer (50 mM Tris/HCl pH  
49 8.0, 0.5 mM EDTA, 0.5 µg/ml lysozyme, 20% w/v sucrose (Sigma)) at 4 °C for 30 min followed  
50 by addition of TBS (pH 8.0) and 1 mM MgCl<sub>2</sub>. Cells were then centrifuged at 10,000 rpm  
51 (Fiberlite™ F21-8 x 507 Fixed Angle Rotor) for 30 min. Following transfer of the supernatant to  
52 a fresh tube, imidazole was added to a final concentration of 10 mM. Ni-NTA resin (Qiagen)  
53 equilibrated with TBS was added to the supernatant and incubated for 1 hr at RT with mild  
54 agitation. The resin was collected, washed three times with buffer supplemented with 30 mM  
55 imidazole and sybody proteins were eluted with 300 mM imidazole in TBS.

56 Plasmid encoding spike HexaPro (designated “S” throughout) was procured from  
57 Addgene (#154754) and transfected into Expi293F™ cells (ThermoFisher Scientific) using  
58 manufacturer’s protocol. Briefly, Expi293F™ cells were seeded to a final density of  $2.5-3 \times 10^6$   
59 viable cells/ml and grown overnight at 37 °C in Expi293™ Expression Medium (Gibco). The  
60 following day, cell viability was determined, and cell density was adjusted to  $3 \times 10^6$  viable  
61 cells/ml with fresh, prewarmed Expi293™ Expression Medium. Transfection was then done as  
62 per manufacturer’s instructions using 1 µg/ml plasmid DNA. Cultures were grown for 6 days  
63 following transfection and supernatant was collected, filtered through a 0.22 µm filter and passed  
64 over Ni-NTA resin for affinity purification. Further purification was accomplished by size-  
65 exclusion chromatography using a Superose 6 10/300 GL column (Cytiva) in a buffer consisting  
66 of 2 mM Tris pH 8.0, 200 mM NaCl.

67

68 *Preparative and analytical size-exclusion chromatography*

69 Sybodies purified by Ni-NTA affinity chromatography were concentrated using Amicon  
70 10K MWCO concentrators and purified on a Sepax SRT-10C SEC100 column at a flow rate of 1  
71 ml/min. Monomeric sybodies elute at a retention volume of 11–12.5 ml from the Sepax SRT-  
72 10C SEC100 column. Monomeric peak fractions were collected and analyzed by SDS-PAGE.  
73 Analytical SEC of RBD sybody complexes was performed on a Shodex KW-802.5 column at a  
74 flow rate of 0.75 ml/min in TBS buffer (pH. 8.0). (The interaction of individual sybodies with  
75 the column matrix is a well-documented phenomenon (36)).

76

77 *Surface Plasmon Resonance*

78 SPR experiments were performed on a Biacore T200 (Cytiva) at 25 °C in 10 mM HEPES  
79 pH 7.2, 150 mM NaCl, 3 mM EDTA, 0.05% Tween-20. RBD was immobilized on a series S  
80 CM5 sensor chip (Cytiva) by amine (NHS/EDC) coupling to flow cells. For background  
81 subtraction a reference cell was mock coupled. Binding and kinetic studies were performed  
82 multiple times for each sybody. Graded and increasing concentrations of SB16, SB45 and SB68  
83 were injected over the RBD-immobilized surface at a flow rate of 30 µl/min with an association  
84 time of 120 s and dissociation time of 2000 s. Binding data were analyzed by surface site affinity  
85 distribution analysis by EVILFIT (37, 38). In general, these values were consistent with fits to  
86 the Langmuir binding equation for a 1:1 interaction model using Biacore T200 Evaluation  
87 Software v3.0, but revealed better statistics.

88

89 *Thermal stability*

90 Thermal melt analysis of the recombinant proteins was performed in triplicate in 96-well  
91 plates in a QuantStudio 7 Flex real time PCR machine (Applied Biosystems). Each well  
92 contained 2-4  $\mu\text{g}$  protein in buffer (25mM TRIS pH 8, 150 mM NaCl) and 5x Sypro Orange  
93 (Invitrogen, stock 5000x) in a total volume of 20  $\mu\text{l}$ . Following an initial two-minute hold at 25  
94  $^{\circ}\text{C}$ , the plate was heated to 99  $^{\circ}\text{C}$  at a rate of 0.05  $^{\circ}\text{C}/\text{sec}$ . Data were analyzed with Protein  
95 Thermal Shift Software v1.3 (Invitrogen) to obtain  $T_m$  values for RBD, S, Sb16, Sb45, and Sb68  
96 (Figure S8).

97

#### 98 *Crystallization, data collection, structure determination and crystallographic refinement*

99 Purified sybodies (Sb16, Sb45 and Sb68) and RBD were mixed in approximate 1:1 molar  
100 ratio to a final concentration of 8 mg/ml. The protein mixtures were incubated on ice for 1 hour  
101 prior to screening. Initial screening for crystals was carried out using the hanging drop vapor  
102 diffusion method using the Mosquito robotic system (sptlabtech.com). Crystals of SB16-RBD  
103 and SB45-RBD complexes and Sb16 alone were observed within one week using Protein  
104 Complex (Qiagen) and Wizard Classic 4 (Rigaku). Conditions for Sb16–RBD were either 0.1M  
105 HEPES pH 7.0, 15% PEG 20000, or 0.1M HEPES pH 7.0, 18% PEG 12000; and for Sb45–RBD  
106 was 18% PEG 12000 and 12% PEG 8000, 0.1 M HEPES pH 7.5, 0.2 M NaCl. Sb16 alone  
107 crystallized in 20% PEG 4000, 0.1 M MES pH 6.0, 0.2 M  $\text{LiSO}_4$ . We also screened mixtures of  
108 two or three sybodies with RBD. Crystals of Sb45–RBD–Sb68 were obtained after one month  
109 following mixing the three proteins in an equimolar ratio in 10% PEG 8000, 0.1M sodium  
110 cacodylate pH 6.0.

111 Crystals of protein complexes were optimized with slight adjustments of the  
112 concentration of PEG components. Crystals were cryoprotected in mother liquor containing 5%

113 ethylene glycol and 5% glycerol and flash frozen in liquid nitrogen for data collection.

114 Diffraction data were collected at the Southeast Regional Collaborative Access Team (SER-

115 CAT) beamline 22ID-D at the Advanced Photon Source, Argonne National Laboratory and data

116 were processed with XDS (39). Multiple data sets were collected for the protein complexes from

117 2.3-3.2 Å resolution. The initial model of Sb16 and Sb45 for the molecular replacement search

118 were built by the MMM server ([manaslu.fiserlab.org/MMM](http://manaslu.fiserlab.org/MMM) (40)), using the heavy chain V

119 domain and the RBD of the Fab B38–RBD complex (PDBid: 7BZ5) (41). The initial model of

120 Sb68 for molecular replacement was built based on the V<sub>H</sub> domain of 7BZ5. Molecular

121 replacement solutions were found using Phaser (42, 43). Subsequent refinements were carried

122 out with PHENIX (44). CDR loops were manually rebuilt by fitting to the electron density maps

123 with Coot (45). In particular, Sb68 CDR loops were deleted before refinement and built in

124 manually based on electron density maps. Illustrations and calculations of superpositioned

125 models were prepared in PyMOL (The PyMOL Molecular Graphics System, Version 2.4.0

126 Schrödinger, LLC). Calculation of hinge relationships of domains was accomplished with

127 HINGE (<https://niaidsis.niaid.nih.gov/hinge.html>), provided courtesy of Peter Sun, NIAID.

128 Buried surface area (BSA) calculations were performed with PISA

129 (<https://www.ebi.ac.uk/pdbe/pisa/>).

130 The final structures for the RBD-SB16 and RBD-SB45 complexes showed  $R_{\text{work}}/R_{\text{free}}$  (%)

131 25.4/27.7 and 18.6/21.6 respectively, and for SB16 alone with  $R_{\text{work}}/R_{\text{free}}$  22.4/25.9. Data

132 collection and structure refinement statistics are provided in Table S1.

133

134

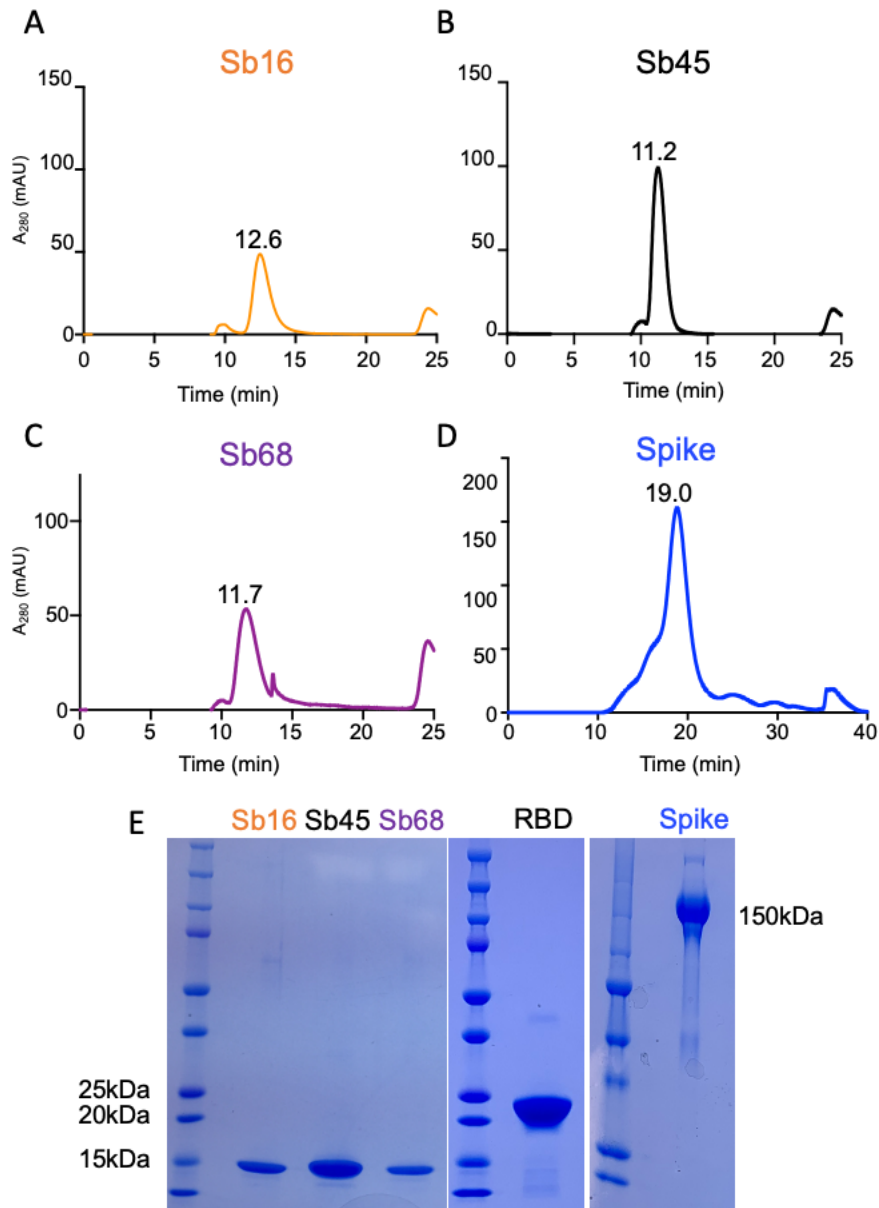

Figure S1.

135

136 **Fig. S1.** SEC profiles and purification of sybodies, RBD, and spike. (A, B, C) Monomeric  
137 sybodies, as indicated, were purified on SRT-10C-SEC100 columns. Elution time of each  
138 sybody is indicated above each peak. The y axis represents A<sub>280</sub> nm absorbance units (mAu). (D)  
139 SEC profile of trimeric spike protein (Superose™ 6 10/300 GL. (E) SDS-PAGE image of  
140 purified sybodies, RBD and spike protein.

141

142

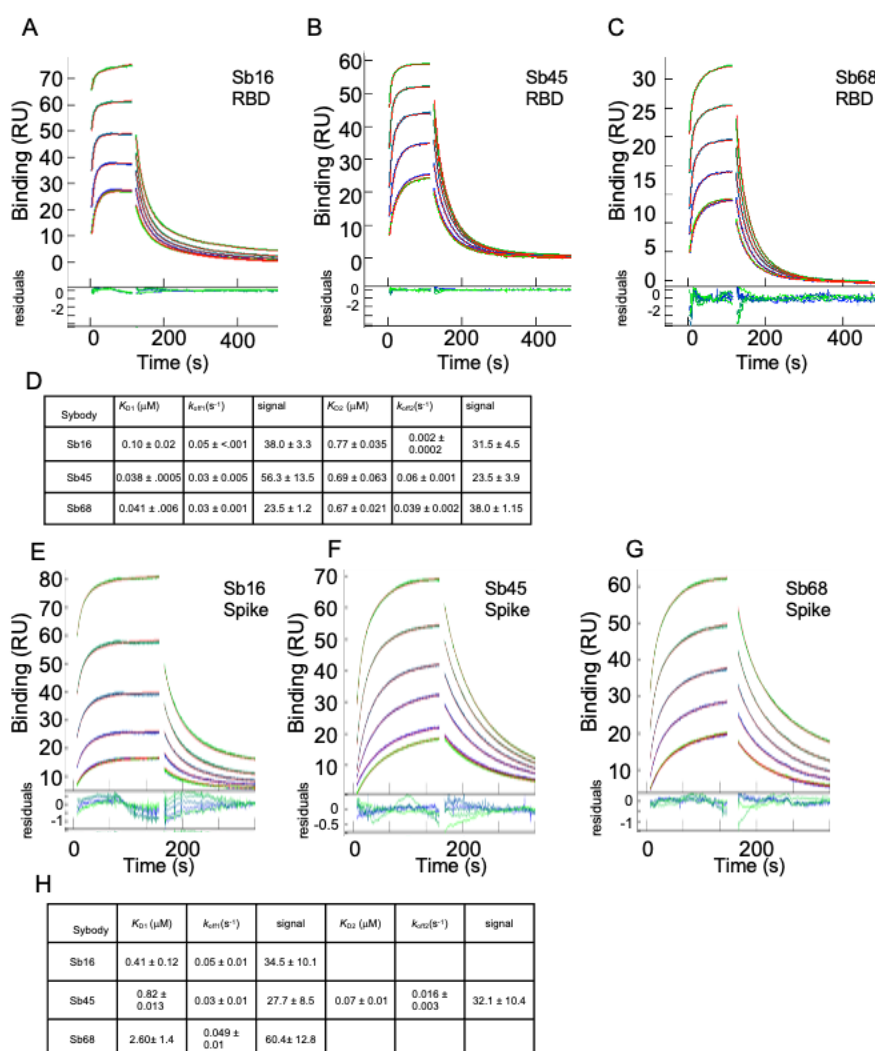

Figure S2.

143

144 **Fig. S2.** Sybodies bind RBD with  $K_D$  values in the nanomolar range. RBD (A, B, C) or S protein  
 145 (E, F, G) was coupled to a biosensor chip as described in Materials and Methods. Graded  
 146 concentrations (31 to 500 nM) were flowed over the coupled surfaces (from  $t=0$  to  $t=120$  s,  
 147 followed by buffer washout) and net RU signal (compared to mock-coupled surface) was  
 148 measured by SPR for Sb16 (A, E); Sb45 (B, F); and Sb68 (C, G). Summary of triplicate mean  $\pm$   
 149 SD determinations is shown in Tables (D, H). Global analysis (curve fits in red, residuals below  
 150 the curves) was accomplished using EVILFIT (37, 38), and the major components of binding are  
 151 shown.

152



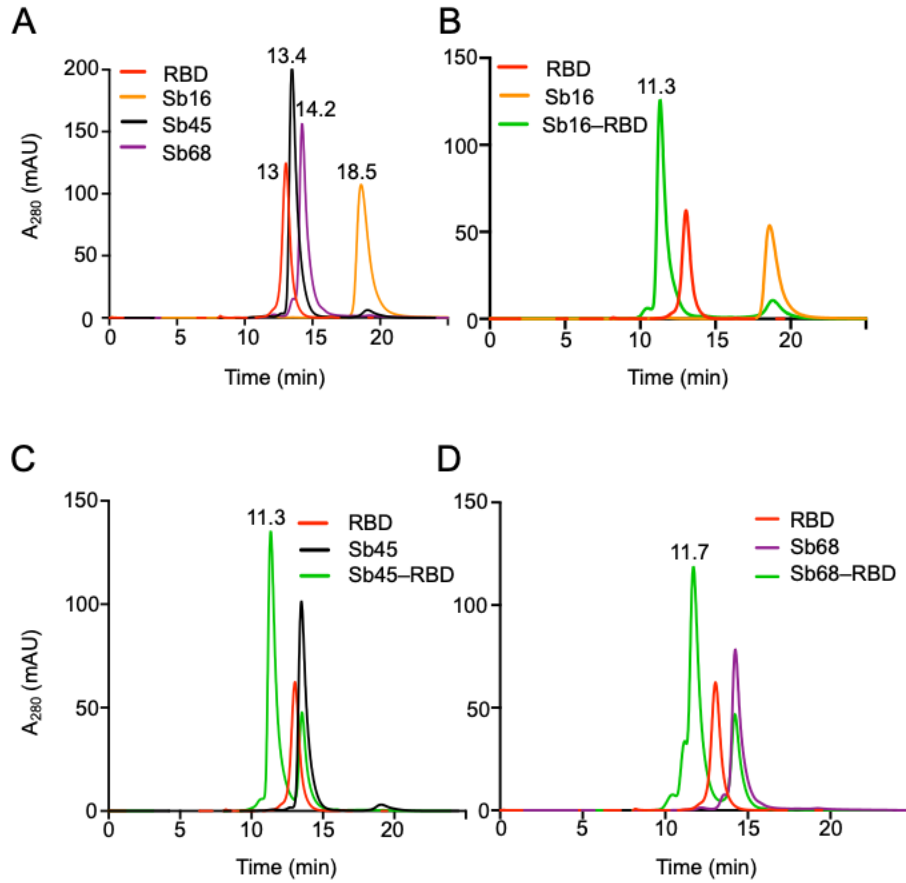

Figure S3.

153

154 **Fig. S3.** SEC profiles reveal direct interaction of sybodies with RBD. (A) Sybodies (50  $\mu$ g) and  
155 RBD (50  $\mu$ g) were injected onto a Shodex-KW-802.5 column (0.75 ml/min) in 100  $\mu$ l  
156 individually and elution times are shown. Sb16 and RBD (B), Sb45 and RBD (C), or Sb68 and  
157 RBD (D) were mixed in equal concentrations (50  $\mu$ g in 100  $\mu$ l), incubated at 4  $^{\circ}$ C overnight and  
158 then analyzed on the Shodex column.

159

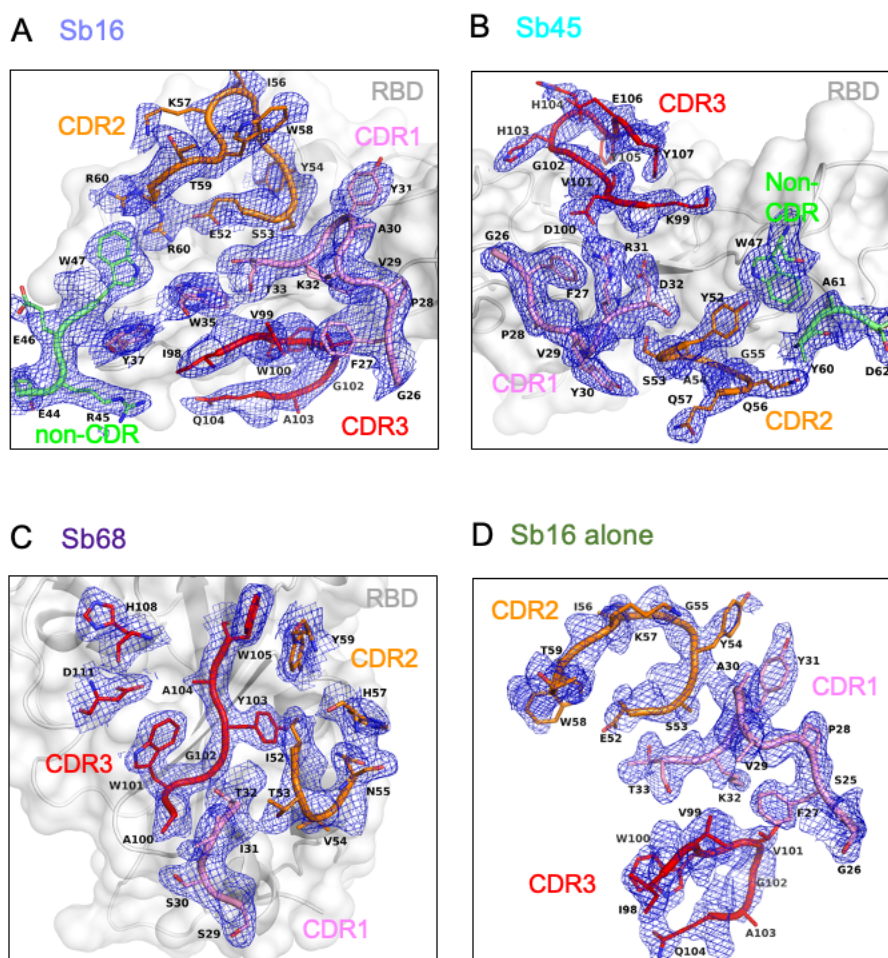

Figure S4.

160

161 **Fig. S4.** Electron density (as blue) maps (2mFo-DFc) for CDR loops and those residues in  
162 contact with RBD: (A) Sb16 on RBD surface, resolution=2.6 Å,  $R_{\text{free}}=0.277$ ; (B) Sb45 on RBD  
163 surface, resolution=2.3 Å,  $R_{\text{free}}=0.216$ ; (C) Sb68 on RBD surface, resolution=2.6 Å,  $R_{\text{free}}=0.255$ ;  
164 (D) Sb16 alone, resolution=2.1 Å,  $R_{\text{free}}=0.259$ . Contour at 1.0 $\sigma$ , CDR1 loop as pink, CDR2 loop  
165 as orange, CDR3 loop as red, non-CDR residues as lime, and RBD is in background as gray.

166

167

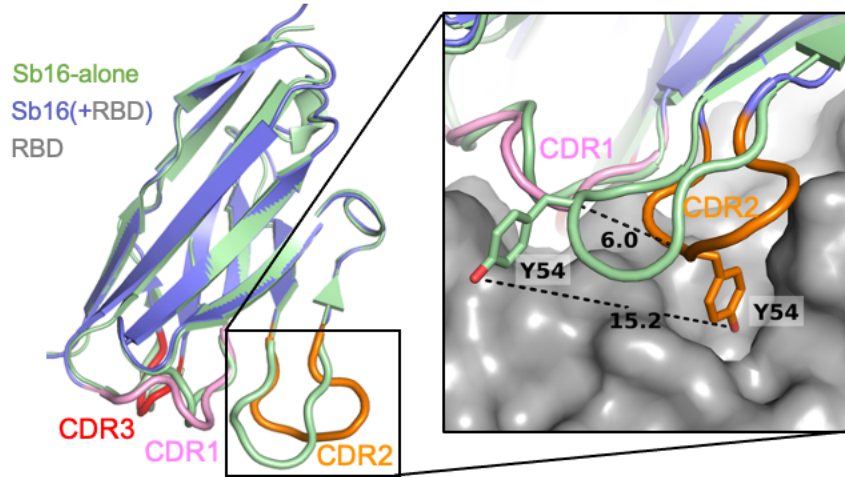

Figure S5.

168

169 **Fig. S5.** A superimposition of Sb16 alone (“unliganded”, free, green) and Sb16–RBD  
170 (“liganded”, complexed, slate) reveals the large movement of CDR2 loop (about 6 Å).  
171 Particularly, Y54 moved about 15 angstroms and dipped into a binding pocket which surrounded  
172 by epitopic residues of Q409, E406, D405, R403, G416, K417, I418, N422, L455, Y453, Y495.  
173 (RBD surface as gray).

174

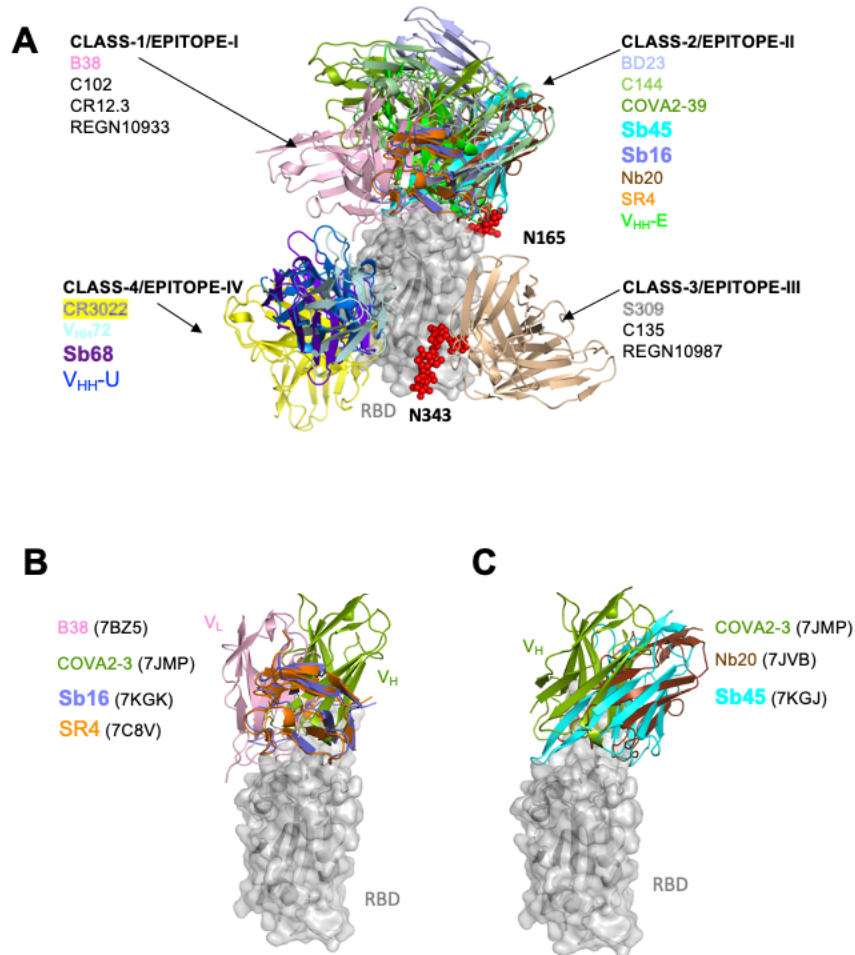

Figure S6

175

176 **Fig. S6.** Sybodies, nanobodies, and antibodies bind different epitopic regions of the RBD. (A)  
 177 Definition of Classes according to Barnes et al. (31) and Epitope area according to Xiang et  
 178 al.(12). Epitope I to IV are almost the same as Class 1 to 4, except for Epitope V which spans  
 179 Class 3 and Class 4 (not shown). Color codes are for representative Fab (only shown are the  
 180 variable domains) or sybody/nanobody. Sb68 falls into Class-4/Epitope-IV overlapping with  
 181 V<sub>HH</sub>72 and HH-E, and CR3022. RBD is in gray and two N-glycans (N165 and N343 in red) are  
 182 shown. (B) Sb16 clashes with L-chain of B38 (7BZ5) of Class-1 and H-chain of COVA2-39  
 183 (7JMP) H-chain Class-2. It falls between Class-1/Epitope-I and Class-2/Epitope-II but almost

184 covers SR4. (C) Sb45 overlaps with H-chain of COVA2-39 (7JMP) of Class-2 and lies in the  
185 same orientation as Nb20 (7JVB) - Epitope-II.  
186

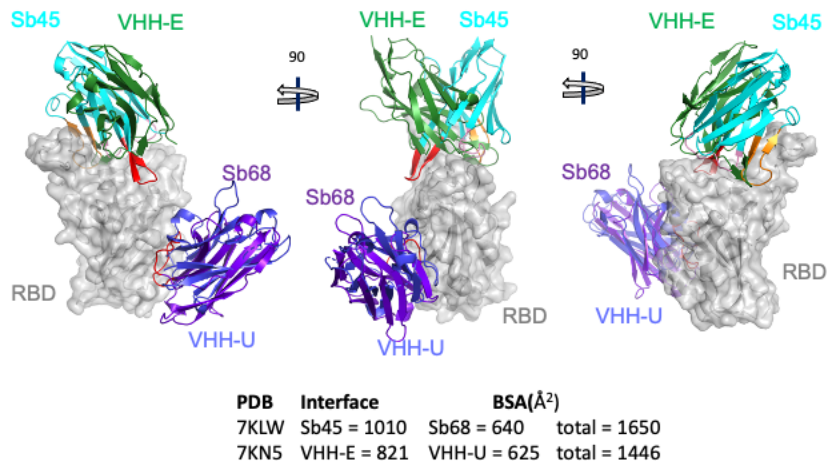

Figure S7

187

188 **Fig. S7.** Comparison of the ternary sybody structure (Sb45–RBD–Sb68, 7KLW) with the ternary  
189 nanobody structure (V<sub>HH</sub>-E–RBD–V<sub>HH</sub>-U, 7KN5), Koenig et al. (32). Sb45 in cyan, Sb68 in  
190 purpleblue, RBD in gray, V<sub>HH</sub>-E in green, V<sub>HH</sub>-U in blue. CDR1, CDR2, and CDR3 of Sb45,  
191 CDR3 of Sb68 are highlighted in pink, orange, and red. Three views are each rotated by 90°.  
192 CDR3 and CDR2 loops of Sb45 ride along both sides of the RBD, while V<sub>HH</sub>-E uses only an  
193 extended CDR3 loop on the side. Sb68 is slightly lower than V<sub>HH</sub>-U while V<sub>HH</sub>-E is similar to  
194 V<sub>HH</sub>72.

195

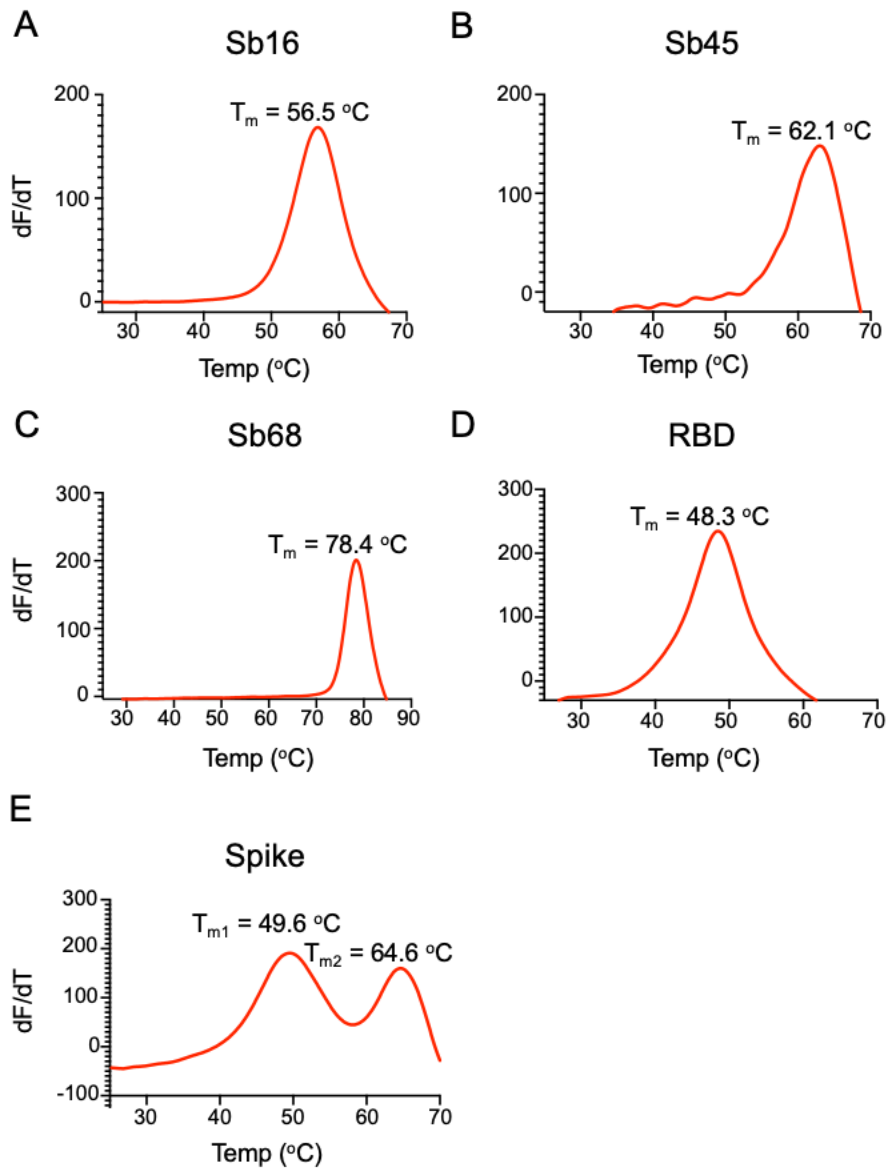

196

197 **Fig. S8.** Sybodies, RBD, and spike protein reveal unique thermal stability. T<sub>m</sub> of each of the  
198 indicated purified proteins was determined by thermal melt analysis as described in Materials  
199 and Methods. Note the biphasic behavior of the trimeric S protein.

200

|                                                         | <b>Sb16-RBD</b>        | <b>Sb45-RBD</b>        | <b>Sb45-RBD-Sb68</b>   | <b>Sb16</b>           |
|---------------------------------------------------------|------------------------|------------------------|------------------------|-----------------------|
| <b>PDBID</b>                                            | <b>7KGK</b>            | <b>7KGJ</b>            | <b>7KLW</b>            | <b>7KGL</b>           |
| <b>Data collection</b>                                  |                        |                        |                        |                       |
| Space group                                             | P6 <sub>5</sub> 22     | P3 <sub>2</sub> 21     | C222 <sub>1</sub>      | P6 <sub>3</sub> 22    |
| Cell dimensions                                         |                        |                        |                        |                       |
| <i>a</i> , <i>b</i> , <i>c</i> (Å)*                     | 65.64, 65.64, 344.69   | 62.55, 62.55, 168.82   | 74.50, 102.40, 138.97  | 69.32, 69.32, 105.57  |
| $\alpha$ , $\beta$ , $\gamma$ (°)□                      | 90.0, 90.0, 120.0      | 90.0, 90.0, 120.0      | 90.0, 90.0, 90.0       | 90.0, 90.0, 120.0     |
| Resolution (Å)                                          | 57.34-2.60 (2.69-2.60) | 45.59-2.30 (2.38-2.30) | 44.12-2.60 (2.69-2.60) | 60.0-2.10 (2.18-2.10) |
| <i>R</i> <sub>sym</sub> or <i>R</i> <sub>merge</sub>    | 0.080 (0.455)          | 0.101 (0.849)          | 0.095 (0.739)          | 0.055 (0.714)         |
| <i>I</i> / $\sigma$ ( <i>I</i> )                        | 18.0 (3.3)             | 14.9 (3.4)             | 13.1 (2.1)             | 17.8 (2.7)            |
| Completeness (%)                                        | 98.8 (99.1)            | 99.3 (98.3)            | 98.8 (98.7)            | 98.9 (98.4)           |
| Redundancy                                              | 10.3 (10.9)            | 7.9 (8.2)              | 7.2 (7.4)              | 6.1 (6.5)             |
| <i>R</i> <sub>pim</sub>                                 | 0.024 (0.134)          | 0.038 (0.293)          | 0.038 (0.287)          | 0.025 (0.311)         |
| CC <sub>1/2</sub>                                       | 0.999 (0.987)          | 0.997 (0.919)          | 0.998 (0.895)          | 0.999 (0.891)         |
| Estimated twin fraction                                 | 0.0 (none)             | 0.06 (-h, -k, l)       | 0.0 (none)             | 0.0 (none)            |
| <b>Refinement</b>                                       |                        |                        |                        |                       |
| Resolution (Å)                                          | 56.09-2.60 (2.69-2.60) | 45.59-2.30 (2.38-2.30) | 36.72-2.60 (2.69-2.60) | 32.9-2.10 (2.18-2.10) |
| No. reflections                                         | 13219 (1185)           | 17592 (1687)           | 16508 (1627)           | 9278 (823)            |
| <i>R</i> <sub>work</sub> / <i>R</i> <sub>free</sub> (%) | 25.8/27.7 (36.3/44.2)  | 18.6/21.6 (24.1/29.8)  | 20.6/25.5 (29.3/34.5)  | 22.4/25.9 (31.9/31.4) |
| No. atoms                                               | 2486                   | 2641                   | 3552                   | 980                   |
| Protein                                                 | 2486                   | 2500                   | 3456                   | 913                   |
| Water + ligands                                         | 0                      | 141                    | 96                     | 67                    |
| B-factor Wilson/Average                                 | 39.3/59.8              | 26.9/32.9              | 33.9/31.5              | 23.2/36.9             |
| Protein                                                 | 59.8                   | 32.8                   | 31.5                   | 37.0                  |
| Water + ligands                                         | 0                      | 34.7                   | 29.5                   | 35.0                  |
| R.m.s. deviations                                       |                        |                        |                        |                       |
| bond length (Å)                                         | 0.002                  | 0.005                  | 0.003                  | 0.003                 |
| bond angle (°)                                          | 0.54                   | 0.74                   | 0.64                   | 0.57                  |
| Ramachandran                                            |                        |                        |                        |                       |



---

|              |      |      |      |      |
|--------------|------|------|------|------|
| avored (%)   | 92.9 | 97.4 | 96.3 | 93.0 |
| allowed (%)  | 7.1  | 2.6  | 3.7  | 6.1  |
| outliers (%) | 0.0  | 0.0  | 0.0  | 0.9  |

---

201 **Table S1.** X-ray data collection and refinement statistics

202 \*Values in parenthesis are for highest resolution shell.

203

204  
205  
206  
207  
208  
209  
210  
211  
212  
213  
214  
215  
216  
217  
218  
219  
220  
221  
222  
223

### ACE2+RBD (6M0J)

| RBD  | ACE2 | DIST | ACE2 | DIST |
|------|------|------|------|------|
| K417 | D30  | 2.90 |      |      |
| Y449 | Q42  | 2.79 | D38  | 2.70 |
| Y453 | H34  | 2.86 |      |      |
| L455 | H34  | 3.62 |      |      |
| F456 | T27  | 3.49 |      |      |
| A475 | Q24  | 3.65 | T27  | 3.97 |
| G476 | Q24  | 4.43 |      |      |
| F486 | Y83  | 3.52 | M82  | 3.64 |
| N487 | Y83  | 2.79 | Q24  | 2.69 |
| Y489 | F28  | 3.55 | Y83  | 3.55 |
| Q493 | K31  | 2.93 | E35  | 3.13 |
| G496 | K31  | 3.08 |      |      |
| Q498 | Q42  | 2.93 | Y41  | 3.59 |
| T500 | R357 | 3.51 | N330 | 3.64 |
| N501 | K353 | 3.61 |      |      |
| G502 | K353 | 2.78 |      |      |
| Y505 | E37  | 3.46 | K353 | 3.61 |

### Sb16+RBD (7KGK)

| RBD  | Sb16 | DIST | Sb16 | DIST | CDR  |
|------|------|------|------|------|------|
| R403 | Y54  | 3.00 |      |      | CDR2 |
| E406 | Y54  | 2.70 |      |      | CDR2 |
| K417 | Y54  | 3.30 |      |      | CDR2 |
| V445 | E44  | 3.00 |      |      |      |
| G446 | Y37  | 3.30 |      |      | CDR1 |
| G447 | Y37  | 3.20 |      |      | CDR1 |
| Y449 | I98  | 3.60 | Q104 | 3.70 | CDR3 |
| L452 | W100 | 3.29 |      |      | CDR3 |
| Y453 | S53  | 2.95 | Y54  | 3.50 | CDR2 |
| L455 | Y31  | 3.49 | S53  | 3.44 | CDR1 |
| F456 | Y31  | 3.37 |      |      | CDR1 |
| E484 | K32  | 2.39 | F27  | 3.30 | CDR1 |
| G485 | P28  | 3.38 |      |      | CDR1 |
| Y489 | Y31  | 3.41 | A30  | 3.34 | CDR1 |
| F490 | W100 | 3.38 |      |      | CDR3 |
| L492 | W100 | 3.85 |      |      | CDR3 |
| Q493 | K32  | 3.51 | T33  | 3.70 | CDR1 |
| S494 | T33  | 3.73 |      |      | CDR1 |
| Y495 | W35  | 3.13 | Y54  | 4.30 | CDR2 |
| G496 | W35  | 3.71 |      |      | CDR1 |
| Q498 | Y37  | 2.91 | W47  | 3.48 |      |
| N501 | R60  | 2.38 |      |      |      |
| G502 | R60  | 3.60 |      |      |      |
| Y505 | A57  | 3.50 | E52  | 3.80 |      |

### Sb45+RBD (7KGJ)

| RBD  | Sb45 | DIST | Sb45 | DIST | CDR  |
|------|------|------|------|------|------|
| Y351 | A54  | 3.80 |      |      | CDR2 |
| R403 | H103 | 3.00 | G102 | 3.30 | CDR3 |
| G446 | F27  | 3.70 | G26  | 3.90 | CDR1 |
| G447 | P28  | 3.50 |      |      | CDR1 |
| Y449 | D100 | 3.80 | R31  | 3.20 | CDR3 |
| N450 | Y30  | 3.50 |      |      | CDR1 |
| L452 | S53  | 3.90 |      |      | CDR2 |
| Y453 | V101 | 3.40 |      |      | CDR3 |
| T470 | G55  | 3.80 | R59  | 2.95 | CDR2 |
| I472 | R59  | 3.90 |      |      |      |
| G482 | R59  | 3.30 |      |      |      |
| V483 | Y60  | 3.60 | D62  | 4.10 |      |
| E484 | R33  | 2.50 | Y52  | 2.60 | CDR1 |
| Y489 | K99  | 4.20 |      |      | CDR3 |
| F490 | A54  | 3.70 |      |      | CDR2 |
| L492 | A54  | 3.70 |      |      | CDR2 |
| Q493 | K99  | 3.10 | D32  | 3.41 | CDR3 |
| S494 | D32  | 2.80 |      |      | CDR1 |
| Y495 | V101 | 3.80 |      |      | CDR3 |
| Q498 | G26  | 3.30 |      |      | CDR1 |
| N501 | H103 | 3.50 |      |      | CDR3 |
| G502 | H103 | 3.30 |      |      | CDR3 |
| Y505 | V101 | 2.86 | H103 | 3.80 | CDR3 |

### Sb68+RBD (7KLW)

| RBD  | Sb68 | DIST | Sb68 | DIST | CDR  |
|------|------|------|------|------|------|
| Y369 | T32  | 3.30 | Y103 | 3.50 | CDR1 |
| N370 | N55  | 3.30 | V54  | 3.90 | CDR2 |
| S371 | N55  | 4.40 |      |      | CDR2 |
| A372 | H57  | 3.20 |      |      | CDR2 |
| F374 | Y103 | 2.90 | Y59  | 3.40 | CDR3 |
| S375 | A104 | 3.40 | W105 | 2.80 | CDR3 |
| T376 | A104 | 3.40 | Y103 |      | CDR3 |
| F377 | G102 | 3.40 | Y103 | 2.90 | CDR3 |
| K378 | D111 | 3.30 | W101 | 3.40 | CDR3 |
| C379 | W101 | 2.80 |      |      | CDR3 |
| V382 | S29  | 4.30 |      |      | CDR1 |
| S383 | A100 | 4.40 |      |      | CDR3 |
| P384 | G101 | 3.60 | A100 | 3.60 | CDR3 |
| T385 | T32  | 3.70 |      |      | CDR1 |
| R408 | H108 | 3.20 | D111 | 2.60 | CDR3 |

224 **Table S2A.** Interactions between RBD Residues and either ACE2 or sybody residues. In each  
225 rectangle (first column) is listed the identification of an RBD amino acid in contact with one or  
226 two residues of the indicted chain. Distance between residues is given in Å. For the sybodies, the  
227 particular CDR designation is also indicated.  
228

|      |                  |                         |                        |     |     |     |   |
|------|------------------|-------------------------|------------------------|-----|-----|-----|---|
|      | 370              | 380                     | 390                    | 400 | 410 | 420 |   |
| RBD  | YNSASFSTFKCYGVSP | TKLNDLCFTNVYADSFVIRGDEV | RQIAPGQTGKIADYNYKLPDDF |     |     |     |   |
| ACE2 |                  |                         |                        |     |     | *   |   |
| Sb16 |                  |                         |                        | *   | *   |     | * |
| Sb45 |                  |                         |                        |     |     |     |   |
| Sb68 | ****             | *****                   | ***                    |     | *   |     |   |

  

|      |                   |                    |                      |      |     |     |       |
|------|-------------------|--------------------|----------------------|------|-----|-----|-------|
|      | 445               | 450                | 460                  | 470  | 480 | 490 | 500   |
| RBD  | VGGNYNYLYRLFRKSNL | KPFERDISTEIQAGSTPC | NGVEGFNCYFPLQSYGFQPT | NGVY |     |     |       |
| ACE2 | *                 | *                  | *                    | **   | *   | **  | *     |
| Sb16 | ***               | *                  | **                   | *    | **  | **  | ***** |
| Sb45 | **                | **                 | **                   | *    | *   | *** | **    |

229 **Table S2B.** Tabulation of residues of RBD that contact each of the indicated chains, based on  
 230 6M0J for ACE2–RBD, 7KGK for Sb16–RBD, 7KGJ for Sb45–RBD, and 7KLW for the Sb68–  
 231 RBD interface. Note that ACE2 contacts broadly overlap those for Sb16 and Sb45, but that Sb68–  
 232 contacts are distinct.

233

234

235

236

237

| <b>Complex (A + B)</b> | <b>BSA(<math>\text{\AA}^2</math>)</b> | <b><math>N_{\text{res}}^{\text{A}}</math></b> | <b><math>N_{\text{res}}^{\text{B}}</math></b> | <b><math>N_{\text{HB}}</math></b> | <b><math>N_{\text{SB}}</math></b> | <b>PDB</b>  | <b>Res. <math>\text{\AA}</math></b> |
|------------------------|---------------------------------------|-----------------------------------------------|-----------------------------------------------|-----------------------------------|-----------------------------------|-------------|-------------------------------------|
| <b>ACE2+RBD</b>        | <b>844</b>                            | <b>26</b>                                     | <b>26</b>                                     | <b>13</b>                         | <b>2</b>                          | <b>6M0J</b> | 2.45                                |
| Sb16+RBD               | <b>1003</b>                           | 26                                            | 29                                            | 8                                 | 1                                 | 7KGK        | 2.60                                |
| Sb45+RBD               | <b>976</b>                            | 27                                            | 33                                            | 15                                | 4                                 | 7KGJ        | 2.10                                |
| *(Sb45)+RBD            | <b>1010</b>                           | 26                                            | 35                                            | 14                                | 4                                 | 7KLW_B      | 2.60                                |
| *(Sb68)+RBD            | <b>640</b>                            | 21                                            | 17                                            | 9                                 | 4                                 | 7KLW_C      | 2.60                                |
| *(Sb45+Sb68)+RBD       | <b>1650</b>                           | 47                                            | 52                                            | 23                                | 8                                 | 7KLW        | 2.60                                |
| *(VHH-E)+RBD           | <b>821</b>                            | 29                                            | 27                                            | 13                                | 1                                 | 7KN5_C      | 1.87                                |
| *(VHH-U)+RBD           | <b>625</b>                            | 16                                            | 20                                            | 17                                | 0                                 | 7KN5_E      | 1.87                                |
| *(VHH-E+VHH-U)+RBD     | <b>1446</b>                           | 45                                            | 47                                            | 30                                | 1                                 | 7KN5        | 1.87                                |
| H11D4+RBD              | <b>599</b>                            | 20                                            | 20                                            | 11                                | 4                                 | 6YZ5        | 1.80                                |
| H11H4+RBD              | <b>637</b>                            | 17                                            | 19                                            | 5                                 | 4                                 | 6ZBP        | 1.85                                |
| (CR3022)+RBD           | <b>991</b>                            | 19                                            | 20                                            | 7                                 | 4                                 | 6XC7_HL     | 2.88                                |
| VHH72+RBD              | <b>796</b>                            | 21                                            | 25                                            | 9                                 | 2                                 | 6WAQ_A      | 2.20                                |
| Nb20+RBD               | <b>705</b>                            | 22                                            | 21                                            | 9                                 | 4                                 | 7JVB        | 3.29                                |
| Nb6+Spike              | <b>788</b>                            | 24                                            | 21                                            | 9                                 | 1                                 | 7KKK_D      | 3.03                                |
| Sb23+Spike             | <b>772</b>                            | 21                                            | 22                                            | 5                                 | 0                                 | 7A25_D      | 3.06                                |
| Sb23+Spike             | <b>585</b>                            | 18                                            | 21                                            | 5                                 | 0                                 | 7A29_D      | 2.94                                |
| Ty1+Spike              | <b>795</b>                            | 23                                            | 26                                            | 3                                 | 0                                 | 6ZXX_D      | 2.93                                |
| C144+Spike             | <b>689</b>                            | 22                                            | 24                                            | 7                                 | 0                                 | 7K90_H      | 3.24                                |
| C002+Spike             | <b>728</b>                            | 22                                            | 23                                            | 7                                 | 1                                 | 7K8S_H      | 3.40                                |
| *(REGN10933)+RBD       | <b>935</b>                            | 28                                            | 30                                            | 9                                 | 1                                 | 6XDG_BD     | 3.90                                |
| *(REGN10987)+RBD       | <b>607</b>                            | 21                                            | 19                                            | 5                                 | 0                                 | 6XDG_AC     | 3.90                                |

---

|                |      |    |    |   |   |      |      |
|----------------|------|----|----|---|---|------|------|
| *(REGN10933+   | 1542 | 49 | 49 | 5 | 0 | 6XDG | 3.90 |
| REGN10987)+RBD |      |    |    |   |   |      |      |

---

238

239 **Table S3.** Variety of Buried Surface Area (BSA) at interfaces of Sybodies, Nanobodies, and  
240 Fabs with RBD or Spike. BSA of each of indicated interface was calculated from the relevant  
241 chains using PISA (<https://www.ebi.ac.uk/pdbe/pisa/>), to account for the non-overlapping  
242 surface area. BSA in Å<sup>2</sup>. N<sub>res</sub> indicates the number of residues in contact; N<sub>HB</sub>, the number of  
243 potential hydrogen bonds; N<sub>SB</sub>, the number of potential salt bridges.

244

245
